# Supplementary material
Source: PubMed Central journal article supplement (PMC4784878)
Supplement: sher026514.ww1_default.pdf [file sher026514.ww1_default.pdf]

## Appendix A – challenging behaviour Read code list

| Read code | Description                                                |
|-----------|------------------------------------------------------------|
| ZV40.11   | [V]Behavioural problems                                    |
| E2C..11   | Behaviour disorder                                         |
| 1B1X.00   | Behavioural problem                                        |
| 1B16.00   | Agitated                                                   |
| 1B16.11   | Agitated - symptom                                         |
| E273100   | Head-banging                                               |
| 1469.00   | H/O: behaviour problem                                     |
| 1P5..00   | Aggressive behaviour                                       |
| R00zD00   | [D]Restlessness and agitation                              |
| 1BE1.00   | Problem situation                                          |
| E2C0000   | Aggressive outburst                                        |
| 1B1I.00   | Crying, excessive                                          |
| 1P00.00   | Hyperactive behaviour                                      |
| E2C0100   | Anger reaction                                             |
| E2C1200   | Tantrums                                                   |
| E2C..00   | Disturbance of conduct NEC                                 |
| E213.11   | Aggressive personality                                     |
| E274F00   | Inversion of sleep rhythm                                  |
| R00z800   | [D]Irritability and anger                                  |
| 1B1O.00   | Restless                                                   |
| 1B15.11   | Irritable - symptom                                        |
| 1B1f.00   | Anger                                                      |
| R00zA00   | [D]Physical violence                                       |
| E293000   | Adjustment reaction with aggression                        |
| ZX17100   | Banging own head against object                            |
| 3AB1.00   | Mildly abnormal behaviour                                  |
| E2Cz.00   | Unspecified disturbance of conduct                         |
| Ry18.00   | [D]Self neglect                                            |
| E2Cy000   | Breath holder                                              |
| ZX1G.00   | Scratches self                                             |
| ZX1LD00   | [X]Self mutilation                                         |
| 2256.00   | O/E - agitated                                             |
| ZV40300   | [V]Other behavioural problems                              |
| E27z300   | Masturbation                                               |
| E213.00   | Explosive personality disorder                             |
| E274E00   | "Short-sleeper"                                            |
| 1P50.00   | Violent acts towards others                                |
| 1P3..00   | Compulsive behaviour                                       |
| 288..11   | Uncooperative                                              |
| 14X4.00   | On sex offenders register                                  |
| Eu70y00   | [X]Mild mental retardation, other impairments of behaviour |
| Ry13.00   | [D]Overactivity                                            |
| 1B15.00   | Irritable                                                  |
| 3AB2.00   | Severely abnormal behaviour                                |
| Eu63300   | [X]Trichotillomania                                        |

|         |                                                                                  |
|---------|----------------------------------------------------------------------------------|
| 1P51.00 | Physically abusive behaviour                                                     |
| 1P52.00 | Verbally abusive behaviour                                                       |
| 1P40.00 | Inappropriate shouting                                                           |
| 225B.00 | O/E - angry                                                                      |
| Z4A9.00 | Discussion about behaviour                                                       |
| ZX1..00 | Self-injurious behaviour                                                         |
| ZX1D.00 | Picking own skin                                                                 |
| U2E..00 | [X]Self mutilation                                                               |
| 1P11.00 | Uncooperative behaviour                                                          |
| Ry12.00 | [D]Strange and inexplicable behaviour                                            |
| 14XA.00 | Alleged perpetrator of sexual abuse                                              |
| ZX11.11 | Bites self                                                                       |
| 13HN000 | Theft                                                                            |
| 13Z8000 | Social adjustment problem                                                        |
| E216.12 | Dependent personality                                                            |
| E216.13 | Labile personality                                                               |
| E275200 | Pica                                                                             |
| E275711 | Compulsive water drinking                                                        |
| E2Gzz00 | Disturbance of conduct NOS                                                       |
| E27z400 | Nail-biting                                                                      |
| Eu72100 | [X]Severe mental retard sig impairment behaviour requiring attention/treatment   |
| J08z100 | Lip biting                                                                       |
| ZX1P.00 | Swallowing substances                                                            |
| 1P02.00 | Disinhibited behaviour                                                           |
| 1Q0..00 | Impulsive character                                                              |
| E2Cy.00 | Other conduct disturbances                                                       |
| Eu70100 | [X]Mild mental retard sig impairment behaviour requiring attention/treatment     |
| Eu72y00 | [X]Severe mental retardation, other impairments of behaviour                     |
| ZX11500 | Biting own tongue                                                                |
| 1P53.00 | Argumentative behaviour                                                          |
| E2E2.00 | Hyperkinetic conduct disorder                                                    |
| 28L..00 | O/E - impulsive behaviour                                                        |
| 14XC.00 | Alleged perpetrator of domestic violence                                         |
| ZX14200 | Pulling out sutures                                                              |
| ZX11.00 | Biting self                                                                      |
| E27z000 | Hair plucking                                                                    |
| Eu71100 | [X]Moderate mental retard sig impairment behaviour requiring attention/treatment |
| Eu7zy00 | [X]Unspecified mental retardation, other impairments of behaviour                |
| Eu92.11 | [X]Emotional behavioural problems                                                |
| Eu7yy00 | [X]Other mental retardation, other impairments of behaviour                      |
| ZX17200 | Banging own head against own body parts                                          |
| 13HN100 | Shoplifting                                                                      |
| ZX1..14 | Self-abusive behaviour                                                           |
| ZX17.00 | Head-banging                                                                     |
| ZX1O.00 | Swallowing objects                                                               |
| Eu63100 | [X]Pathological fire-setting                                                     |
| ZX1..11 | Self-destructive behaviour                                                       |
| ZX14.00 | Damaging own wounds                                                              |

|         |                                                                                     |
|---------|-------------------------------------------------------------------------------------|
| ZX17300 | Head-butting other person                                                           |
| ZX19.00 | Hitting self                                                                        |
| ZX19300 | Head-hitting                                                                        |
| ZX1F.00 | Rubbing own skin                                                                    |
| 14X9.00 | Alleged perpetrator of physical abuse                                               |
| E293100 | Adjustment reaction with antisocial behaviour                                       |
| Eu71y00 | [X]Moderate retardation with other behavioural impairment                           |
| J08z000 | Cheek biting                                                                        |
| R00z700 | [D]Demoralization and apathy                                                        |
| R2y3.11 | [D] Self neglect                                                                    |
| ZX1..12 | SIB - Self-injurious behaviour                                                      |
| 28C..00 | O/E - embarrassing behaviour                                                        |
| E293.00 | Adjustment reaction with predominant disturbance of conduct                         |
| Eu7z100 | [X]Unspecified mental retard sig impairment behaviour requiring attention/treatment |
| R00z900 | [D]Hostility                                                                        |
| ZX11200 | Biting own fingers                                                                  |
| ZX11400 | Biting own arm                                                                      |
| ZX16211 | Poking own eyes                                                                     |
| ZX19200 | Slapping self                                                                       |
| E2C1100 | Solitary stealing                                                                   |
| E2C4.00 | Mixed disturbance of conduct and emotion                                            |
| E2C4z00 | Mixed disturbance of conduct and emotion NOS                                        |
| Eu73100 | [X]Profound mental retard sig impairment behaviour requiring attention/treatment    |
| Eu7y100 | [X]Other mental retard sig impairment behaviour requiring attention/treatment       |
| Z7CCC00 | Found wandering the streets                                                         |
| ZX11100 | Biting own hand                                                                     |
| ZX11111 | Hand biting                                                                         |
| ZX11300 | Biting own toes                                                                     |
| ZX16300 | Gouging own rectum                                                                  |
| ZX1L.00 | Self-mutilation                                                                     |
| E2C3300 | Pyromania                                                                           |
| Eu73y00 | [X]Profound mental retardation, other impairments of behaviour                      |
| Z7CCB00 | Wandering                                                                           |
| ZX19100 | Punching self                                                                       |
| ZX1A.00 | Inserting foreign bodies into own orifices                                          |
| ZX1E.00 | Pinching self                                                                       |
| ZX1L100 | Self-mutilation of hands                                                            |
| ZX1S.00 | Throwing self onto floor                                                            |
| 14XB.00 | Alleged perpetrator of emotional abuse                                              |
| 1B1M.00 | Resents authority                                                                   |
| 1P10.00 | Clinging behaviour                                                                  |
| 28C..11 | O/E - irreverent behaviour                                                          |
| E213.12 | Quarrelsome personality                                                             |
| E275111 | Compulsive eating disorder                                                          |
| E292y00 | Adjustment reaction with mixed disturbance of emotion                               |
| E292z00 | Adjustment reaction with disturbance of other emotion NOS                           |
| E293200 | Adjustment reaction with destructiveness                                            |
| E293z00 | Adjustment reaction with predominant disturbance conduct NOS                        |

|         |                                                          |
|---------|----------------------------------------------------------|
| E294.00 | Adjustment reaction with disturbance emotion and conduct |
| E2C3400 | Intermittent explosive disorder                          |
| E2C3500 | Isolated explosive disorder                              |
| E2Cyz00 | Other conduct disturbances NOS                           |
| E2D1.13 | Taunting / tormenting                                    |
| Z43C.00 | Questioning the client about his or her behaviour        |
| Z43C.11 | Challenging the client about his or her behaviour        |
| Z43G800 | Smacking                                                 |
| ZX11600 | Biting sides of own cheeks                               |
| ZX14100 | Reopening scars                                          |
| ZX14300 | Poking fingers into wound                                |
| ZX14400 | Inserting objects into wound                             |
| ZX16.00 | Gouging own body parts                                   |
| ZX16100 | Gouging own flesh                                        |
| ZX16200 | Gouging own eyes                                         |
| ZX16400 | Gouging own vagina                                       |
| ZX1C.00 | Nipping self                                             |
| ZX1L200 | Self-mutilation of genitalia                             |
| ZX1L300 | Self-mutilation of penis                                 |
| ZX1L400 | Self-mutilation of eyes                                  |
| ZX1L600 | Self-mutilation of ears                                  |
| ZX1LA00 | Removing own nails                                       |
| ZX1LB00 | Eating own flesh                                         |
| ZX1LC00 | Stripping own skin                                       |
| 14OE.00 | At risk of harming others                                |
| 1BN..00 | Wandering                                                |
| 1BN0.00 | Wanders during the day                                   |
| 1BN1.00 | Wanders at night                                         |
| 1BN2.00 | Wanders during the day and at night                      |
| E224.00 | Exhibitionism                                            |
| E224.11 | Flasher                                                  |
| E22y100 | Voyeurism                                                |
| Eu65000 | [X]Fetishism                                             |
| Eu65200 | [X]Exhibitionism                                         |
| Eu65300 | [X]Voyeurism                                             |
| Eu65y11 | [X]Frotteurism                                           |
| Eu65z11 | [X]Sexual deviation NOS                                  |
| E2C1111 | Shop lifting                                             |
| Z7CC900 | Getting lost                                             |
| Z7CCA00 | Getting lost inside the home                             |
| 1B1B.00 | Cannot sleep – insomnia                                  |
| 1B1B.11 | C/O – insomnia                                           |
| 1B1B000 | Initial insomnia                                         |
| 1B1B100 | Middle insomnia                                          |
| 1B1B200 | Late insomnia                                            |
| 1B1Q.00 | Poor sleep pattern                                       |
| 1BX0.00 | Delayed onset of sleep                                   |
| E274.00 | Non-organic sleep disorders                              |

|         |                                                      |
|---------|------------------------------------------------------|
| E274.12 | Insomnia due to nonorganic sleep disorder            |
| E274000 | Unspecified non-organic sleep disorder               |
| E274111 | Insomnia NOS                                         |
| E274200 | Persistent insomnia                                  |
| E274D11 | Restless sleep                                       |
| E274y00 | Other non-organic sleep disorder                     |
| E274z00 | Non-organic sleep disorder NOS                       |
| Eu51.00 | [X]Nonorganic sleep disorders                        |
| Eu51000 | [X]Nonorganic insomnia                               |
| Eu51200 | [X]Nonorganic disorder of the sleep-wake schedule    |
| Eu51y00 | [X]Other nonorganic sleep disorders                  |
| Eu51z00 | [X]Nonorganic sleep disorder, unspecified            |
| Eu51z11 | [X]Emotional sleep disorder NOS                      |
| Fy0..00 | Sleep disorders                                      |
| Fy00.00 | Disorders of initiating and maintaining sleep        |
| Fy02.00 | Disorders of the sleep-wake schedule                 |
| Fyu5800 | [X]Other sleep disorders                             |
| R005.00 | [D]Sleep disturbances                                |
| R005.12 | [D]Sleep rhythm problems                             |
| R005000 | [D]Sleep disturbance, unspecified                    |
| R005800 | [D]Sleep dysfunction with sleep stage disturbance    |
| R005800 | [D]Sleep dysfunction with sleep stage disturbance    |
| R005900 | [D]Sleep dysfunction with arousal disturbance        |
| R005z00 | [D]Sleep dysfunction NOS                             |
| ZV1B100 | [V]Personal history of unhealthy sleep-wake schedule |



|  |  |  |  |  |  |    |      |
|--|--|--|--|--|--|----|------|
|  |  |  |  |  |  | 67 | 0.2  |
|  |  |  |  |  |  | 42 | 0.13 |
|  |  |  |  |  |  | 39 | 0.12 |
|  |  |  |  |  |  | 34 | 0.1  |
|  |  |  |  |  |  | 34 | 0.1  |
|  |  |  |  |  |  | 32 | 0.1  |
|  |  |  |  |  |  | 28 | 0.08 |
|  |  |  |  |  |  | 23 | 0.07 |
|  |  |  |  |  |  | 23 | 0.07 |
|  |  |  |  |  |  | 20 | 0.06 |
|  |  |  |  |  |  | 20 | 0.06 |
|  |  |  |  |  |  | 18 | 0.05 |
|  |  |  |  |  |  | 18 | 0.05 |
|  |  |  |  |  |  | 16 | 0.05 |
|  |  |  |  |  |  | 14 | 0.04 |
|  |  |  |  |  |  | 13 | 0.04 |
|  |  |  |  |  |  | 10 | 0.03 |
|  |  |  |  |  |  | 5  | 0.02 |
|  |  |  |  |  |  | 5  | 0.02 |
|  |  |  |  |  |  | 4  | 0.01 |
|  |  |  |  |  |  | 3  | 0.01 |
|  |  |  |  |  |  | 2  | 0.01 |
|  |  |  |  |  |  | 2  | 0.01 |
|  |  |  |  |  |  | 2  | 0.01 |
